# Supplementary material for: Transcriptome profiling of a spirodiclofen susceptible and resistant strain of the European red mite Panonychus ulmi using strand-specific RNA-seq
Source: PubMed Central journal article supplement (PMC4652392; doi:10.1186/s12864-015-2157-1), 2015-11-18

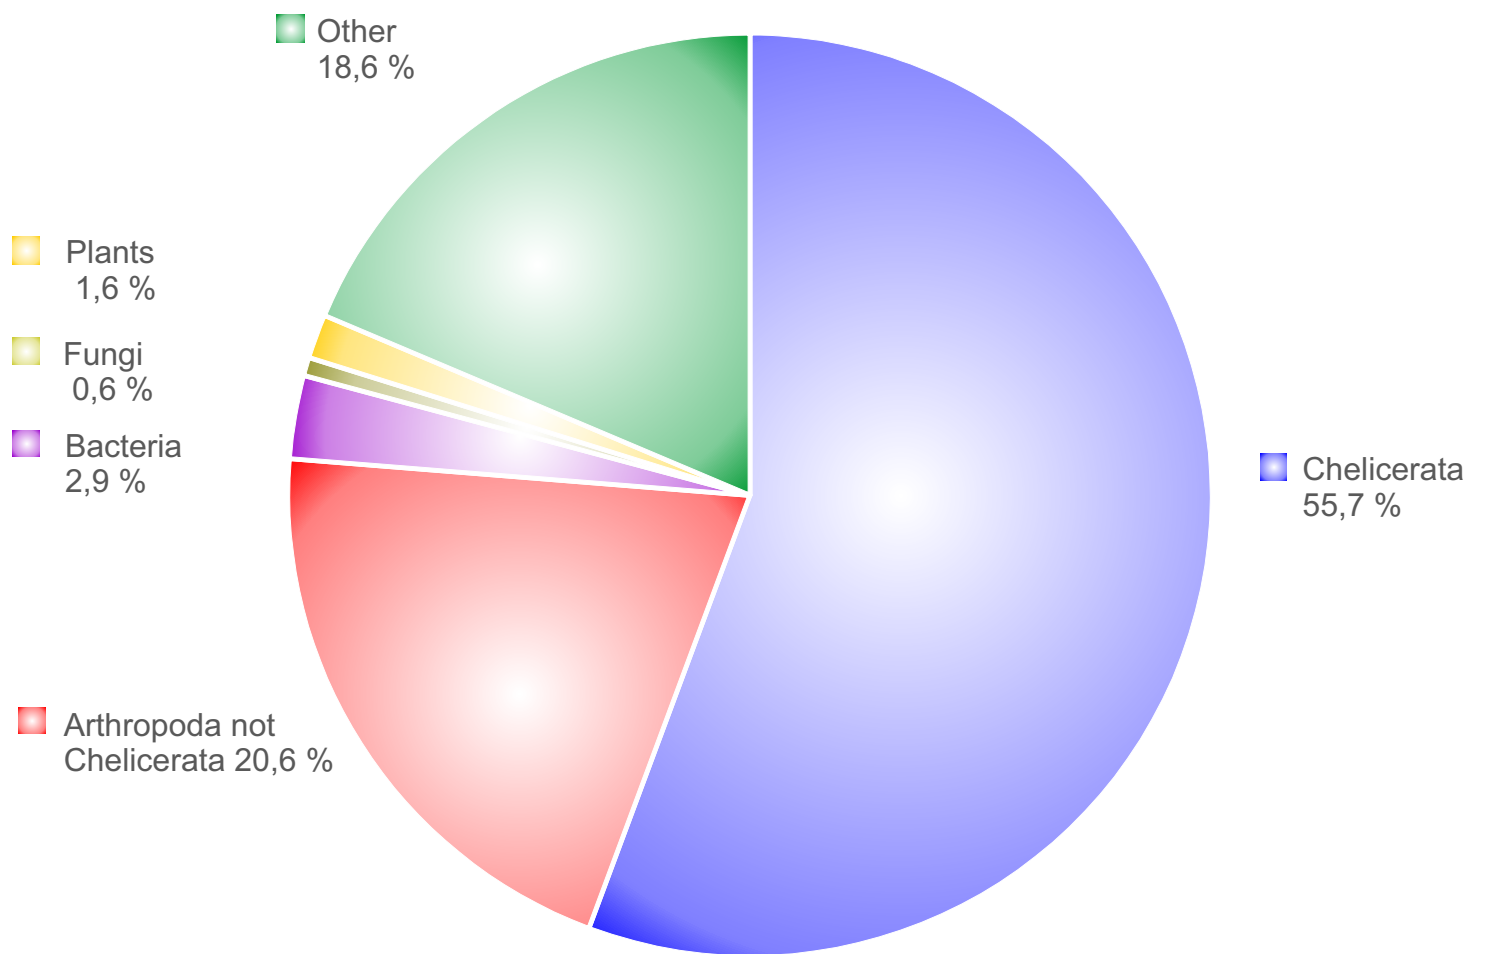

Supplement: 12864_2015_2157_MOESM5_ESM.pdf [file 12864_2015_2157_MOESM5_ESM.pdf]
