# Supplementary material for: Transcriptome profiling of a spirodiclofen susceptible and resistant strain of the European red mite Panonychus ulmi using strand-specific RNA-seq
Source: BMC Genomics. 2015 Nov 18;16:974. doi: 10.1186/s12864-015-2157-1 (PMC4652392; doi:10.1186/s12864-015-2157-1)
Supplement: Additional file 18: Table S10. — Differentially expressed contigs in the P. ulmi PSR-TK strain with a BLASTx (E-value treshold e-15) hit against amino acid translations of differentially expressed genes in SR-VP and SR-TK, two spirodiclofen resistant T. urticae strains [20]. (XLSX 48 kb) [file 12864_2015_2157_MOESM18_ESM.xlsx]

## Sheet: Table S10
Additional file 18 - Differentially expressed P. ulmi contigs in the PSR-TK strain with a BLASTx hit (E-value treshold e-15 and maximum number of target sequences set to five) against amino acid translations of differentially expressed genes in SR-VP and SR-TK, two spirodiclofen resistant T. urticae strains (Demaeght et al. 2013, Insect Biochemistry and Molecular Biology)
P. ulmi contig	P. ulmi PSR-TK Log2(Fold Change)	T. urticae ID BLASTx hit	T. urticae SR-VP Fold Change	T. urticae SR-TK Fold Change	Description T. urticae gene	E-value
Contig_01016	5.13417	tetur11g05000	2.73942	#N/A	length:491 (mRNA) (CYP385C2) (Cytochrome P450 - CYP385C2)	0.0
Contig_01016	5.13417	tetur06g02420	2.19256	#N/A	length:485 (mRNA) (CYP385C-p) (Cytochrome P450 - CYP385Cp probable pseudogene)	3e-160
Contig_01016	5.13417	tetur01g00650	#N/A	4.38922	length:573 (mRNA) (CYP4CL1) (cytochrome P450 - CYP4CL1) (n/a) (cytochrome P450) (n/a) (cytochrome P450)	2e-32
Contig_01016	5.13417	tetur20g00290	2.30326	#N/A	length:510 (mRNA) (CYP392B3) (Cytochrome P450 - CYP392B3)	7e-21
Contig_01016	5.13417	tetur16g03500	2.49928	#N/A	length:503 (mRNA) (CYP392A7) (Cytochrome P450 - CYP392A7)	2e-19
Contig_19626	5.05782	tetur01g10820	9.15315	#N/A	length:580 (mRNA) (TuCCE08) (Carboxyl/cholinesterase) (TuCCE-08) (Carboxyl/cholinesterase)	3e-72
Contig_19626	5.05782	tetur01g10760	-7.72263	-3.36318	length:583 (mRNA) (TuCCE05) (Carboxyl/cholinesterase) (TuCCE-05) (Carboxyl/cholinesterase)	1e-52
Contig_19626	5.05782	tetur01g10740	3.47381	#N/A	length:550 (mRNA) (TuCCE03) (Carboxyl/cholinesterase) (TuCCE-03) (Carboxyl/cholinesterase)	3e-52
Contig_19626	5.05782	tetur01g16180	#N/A	-2.24419	length:562 (mRNA) (TuCCE13) (Carboxyl/cholinesterase) (TuCCE-13) (Carboxyl/cholinesterase)	2e-49
Contig_19626	5.05782	tetur35g00180	2.1292	2.6137	length:184 (mRNA) (CCEincTu13) (Carboxyl/cholinesterase, incomplete) (CCEincTu15) (Carboxyl/cholinesterase,	3e-48
Contig_08154	3.61027	tetur09g00480	-3.37433	#N/A	length:225 (mRNA) (DDM9-4) (Protein of unknown function DM9) (n/a) (Protein of unknown function DM9)	1e-42
Contig_08154	3.61027	tetur09g00500	#N/A	-3.81395	length:222 (mRNA) (DDM9-8) (Conserved Protein of Unknown Function with 2 DM9 repeats) (n/a) (hypothetical pr	1e-38
Contig_08154	3.61027	tetur17g03440	2.3724	#N/A	length:213 (mRNA) (DDM9-13) (Protein of unknown function DM9) (n/a) (Protein of unknown function DM9)	8e-35
Contig_08154	3.61027	tetur17g03390	2.7224	#N/A	length:215 (mRNA) (DDM9-17) (Protein of unknown function DM9) (n/a) (Protein of unknown function DM9)	9e-34
Contig_08154	3.61027	tetur05g04100	2.05202	#N/A	length:229 (mRNA) (DDM9-18) (Conserved Protein of Unknown Function with 2 DM9 repeats) (n/a) (hypothetical p	2e-32
Contig_00577	3.58999	tetur01g16180	#N/A	-2.24419	length:562 (mRNA) (TuCCE13) (Carboxyl/cholinesterase) (TuCCE-13) (Carboxyl/cholinesterase)	0.0
Contig_00577	3.58999	tetur30g01290	-7.62843	-373.355	length:567 (mRNA) (TuCCE61) (Carboxyl/cholinesterase) (TuCCE-51) (Carboxyl/cholinesterase)	4e-58
Contig_00577	3.58999	tetur17g00080	2.21413	2.3677	length:561 (mRNA) (TuCCE44) (Carboxyl/cholinesterase) (TuCCE-38) (Carboxyl/cholinesterase)	6e-55
Contig_00577	3.58999	tetur17g00300	2.28486	2.4327	length:574 (mRNA) (TuCCE45) (Carboxyl/cholinesterase) (TuCCE-39) (Carboxyl/cholinesterase)	2e-54
Contig_00577	3.58999	tetur207g00010	2.26827	2.39454	length:544 (mRNA) (TuCCE70) (Carboxyl/cholinesterase) (TuCCE-60) (Carboxyl/cholinesterase)	7e-54
Contig_01487	3.46572	tetur31g00700	3.7947	#N/A	length:343 (mRNA) (TuPap-48) (Cathepsin L)	2e-85
Contig_01487	3.46572	tetur123g00050	2.07186	#N/A	length:339 (mRNA) (TuPap-56) (Cathepsin L)	1e-72
Contig_01487	3.46572	tetur13g02500	2.27033	#N/A	length:575 (mRNA) (n/a) (Hypothetical protein)	1e-36
Contig_06838	3.2688	tetur32g00060	#N/A	-2.56891	length:442 (mRNA) (n/a) (PREDICTED: similar to Glucosylceramidase precursor)	2e-89
Contig_06838	3.2688	tetur02g07770	#N/A	-2.06575	length:529 (mRNA) (n/a) (Glycoside hydrolase, subgroup, catalytic core)	3e-88
Contig_06838	3.2688	tetur06g01690	#N/A	-2.21514	length:166 (mRNA) (n/a) (Glycoside hydrolase, subgroup, catalytic core)	4e-32
Contig_01015	2.88083	tetur06g02420	2.19256	#N/A	length:485 (mRNA) (CYP385C-p) (Cytochrome P450 - CYP385Cp probable pseudogene)	9e-38
Contig_01015	2.88083	tetur11g05000	2.73942	#N/A	length:491 (mRNA) (CYP385C2) (Cytochrome P450 - CYP385C2)	2e-37
Contig_01015	2.88083	tetur01g00650	#N/A	4.38922	length:573 (mRNA) (CYP4CL1) (cytochrome P450 - CYP4CL1) (n/a) (cytochrome P450) (n/a) (cytochrome P450)	3e-17
Contig_16485	2.55485	tetur02g07770	#N/A	-2.06575	length:529 (mRNA) (n/a) (Glycoside hydrolase, subgroup, catalytic core)	2e-20
Contig_16485	2.55485	tetur32g00060	#N/A	-2.56891	length:442 (mRNA) (n/a) (PREDICTED: similar to Glucosylceramidase precursor)	1e-18
Contig_09778	2.46911	tetur30g01770	2.12831	#N/A	length:271 (mRNA) (n/a) (Hypothetical protein)	8e-48
Contig_09778	2.46911	tetur30g01690	4.18667	4.68958	length:751 (mRNA) (n/a) (UNCoordinated family member)	3e-47
Contig_09778	2.46911	tetur30g01690	4.18667	4.68958	length:751 (mRNA) (n/a) (UNCoordinated family member)	4e-33
Contig_09778	2.46911	tetur30g01800	4.19433	#N/A	length:280 (mRNA) (n/a) (Hypothetical protein)	3e-46
Contig_09778	2.46911	tetur30g01660	3.71348	4.62998	length:283 (mRNA) (n/a) (Hypothetical protein)	5e-46
Contig_09778	2.46911	tetur30g01840	2.13319	#N/A	length:273 (mRNA) (n/a) (Hypothetical protein)	2e-45
Contig_05691	2.07446	tetur01g05690	-2.80769	#N/A	length:439 (mRNA) (UGT) (UDP-glycosyltransferase, teturUGT02) (UGT) (UDP-glycosyltransferase) (n/a) (Glycos	4e-25
Contig_05691	2.07446	tetur21g01370	-7.79648	#N/A	length:284 (mRNA) (n/a) (undecaprenyldiphospho-muramoylpentapeptide beta-N-acetylglucosaminyltransferase)	8e-24
Contig_05691	2.07446	tetur01g05700	-2.24591	#N/A	length:444 (mRNA) (UGT) (UDP-glycosyltransferase, teturUGT03) (UGT) (UDP-glycosyltransferase) (n/a) (Glycos	4e-22
Contig_05691	2.07446	tetur04g07770	2.36097	#N/A	length:438 (mRNA) (UGT) (UDP-glycosyltransferase, teturUGT18) (UGT) (UDP-glycosyltransferase) (n/a) (Glycos	8e-20
Contig_05691	2.07446	tetur02g01310	2.12098	#N/A	length:439 (mRNA) (UGT) (UDP-glycosyltransferase, teturUGT06) (UGT) (UDP-glycosyltransferase) (n/a) (rhamno	1e-19
Contig_19313	2.0013	tetur21g00410	2.71448	#N/A	length:459 (mRNA) (n/a) (sodium-dependent glucose transporter 1)	2e-115
Contig_19313	2.0013	tetur40g00030	12.0937	8.27581	length:437 (mRNA) (n/a) (Major facilitator superfamily, general substrate transporter)	1e-65
Contig_19313	2.0013	tetur01g06570	#N/A	2.97613	length:445 (mRNA) (n/a) (sodium-dependent glucose transporter 1)	3e-64
Contig_19313	2.0013	tetur01g06600	2.22966	#N/A	length:442 (mRNA) (n/a) (PREDICTED: hypothetical protein)	2e-62
Contig_05499	1.66109	tetur03g07920	2.43096	#N/A	length:219 (mRNA) (TuGSTd06) (Glutathione S-transferase, delta class)	8e-95
Contig_05499	1.66109	tetur01g02470	2.92324	2.07531	length:217 (mRNA) (TuGSTd02) (Glutathione S-transferase, class delta) (n/a) (Glutathione S-transferase, clas	2e-63
Contig_05499	1.66109	tetur03g07880	2.28756	#N/A	length:123 (mRNA) (TuGSTinc03) (Glutathione-S-transferase, incomplete)	1e-44
Contig_21104	1.60973	tetur21g02150	#N/A	2.03293	length:1309 (mRNA) (n/a) (PREDICTED: hypothetical protein)	1e-67
Contig_21104	1.60973	tetur21g02150	#N/A	2.03293	length:1309 (mRNA) (n/a) (PREDICTED: hypothetical protein)	1e-67
Contig_21104	1.60973	tetur407g00010	3.76521	#N/A	length:893 (mRNA) (n/a) (dentin sialophosphoprotein precursor)	3e-54
Contig_21104	1.60973	tetur14g00970	2.11118	#N/A	length:1247 (mRNA) (PUFA1) (Conserved protein with unknown function) (n/a) (5' nucleotidase)	1e-43
Contig_02881	1.5959	tetur17g00080	2.21413	2.3677	length:561 (mRNA) (TuCCE44) (Carboxyl/cholinesterase) (TuCCE-38) (Carboxyl/cholinesterase)	2e-81
Contig_02881	1.5959	tetur17g00300	2.28486	2.4327	length:574 (mRNA) (TuCCE45) (Carboxyl/cholinesterase) (TuCCE-39) (Carboxyl/cholinesterase)	1e-80
Contig_02881	1.5959	tetur03g02700	-2.40316	#N/A	length:545 (mRNA) (TuCCE21) (Carboxyl/cholinesterase) (TuCCE-21) (Carboxyl/cholinesterase)	2e-79
Contig_02881	1.5959	tetur207g00010	2.26827	2.39454	length:544 (mRNA) (TuCCE70) (Carboxyl/cholinesterase) (TuCCE-60) (Carboxyl/cholinesterase)	2e-79
Contig_02881	1.5959	tetur30g01290	-7.62843	-373.355	length:567 (mRNA) (TuCCE61) (Carboxyl/cholinesterase) (TuCCE-51) (Carboxyl/cholinesterase)	4e-78
Contig_05320	1.33414	tetur17g00740	-7.41334	#N/A	length:216 (mRNA) (n/a) (Hypothetical protein)	6e-20
Contig_05320	1.33414	tetur11g05450	2.11064	#N/A	length:218 (mRNA) (Csp1f) (conserved secreted protein 1) (n/a) (Hypothetical protein)	2e-18
Contig_05320	1.33414	tetur11g05420	2.13692	#N/A	length:218 (mRNA) (Csp1e) (conserved secreted protein 1) (n/a) (Hypothetical protein)	4e-18
Contig_05320	1.33414	tetur46g00020	2.20739	#N/A	length:235 (mRNA) (n/a) (Hypothetical protein)	5e-17
Contig_05053	1.27292	tetur09g06700	-2.44965	#N/A	length:438 (mRNA) (n/a) (unnamed protein product)	8e-57
Contig_05053	1.27292	tetur21g01590	-2.31628	#N/A	length:440 (mRNA) (n/a) (lysosomal acid lipase/cholesteryl ester hydrolase)	2e-36
Contig_05053	1.27292	tetur11g01940	-2.23396	#N/A	length:480 (mRNA) (n/a) (lipase 1 precursor)	5e-32
Contig_24491	1.24825	tetur407g00010	3.76521	#N/A	length:893 (mRNA) (n/a) (dentin sialophosphoprotein precursor)	5e-55
Contig_24491	1.24825	tetur407g00010	3.76521	#N/A	length:893 (mRNA) (n/a) (dentin sialophosphoprotein precursor)	5e-55
Contig_24491	1.24825	tetur14g00970	2.11118	#N/A	length:1247 (mRNA) (PUFA1) (Conserved protein with unknown function) (n/a) (5' nucleotidase)	6e-33
Contig_24491	1.24825	tetur14g00970	2.11118	#N/A	length:1247 (mRNA) (PUFA1) (Conserved protein with unknown function) (n/a) (5' nucleotidase)	6e-33
Contig_24491	1.24825	tetur21g02150	#N/A	2.03293	length:1309 (mRNA) (n/a) (PREDICTED: hypothetical protein)	2e-30
Contig_00059	1.24366	tetur07g04580	#N/A	-2.20867	length:647 (mRNA) (n/a) (peroxinectin, putative)	6e-108
Contig_00059	1.24366	tetur09g04550	#N/A	-2.0351	length:770 (mRNA) (n/a) (PREDICTED: similar to oxidase/peroxidase) (n/a) (PREDICTED: similar to oxidase/pero	6e-102
Contig_00914	1.23749	tetur14g00050	-4.76546	-4.43708	length:899 (mRNA) (XCAM1) (Novel hypothetical cell adhesion molecule) (DSCAM1) (Down syndrome cell adhesion	2e-75
Contig_00914	1.23749	tetur14g00050	-4.76546	-4.43708	length:899 (mRNA) (XCAM1) (Novel hypothetical cell adhesion molecule) (DSCAM1) (Down syndrome cell adhesion	6e-17
Contig_01565	1.2363	tetur32g01250	2.00285	#N/A	length:502 (mRNA) (UGT) (UDP-glycosyltransferase, teturUGT75) (UGT) (UDP-glycosyltransferase) (n/a) (glycos	4e-84
Contig_01565	1.2363	tetur11g01830	-2.18825	#N/A	length:480 (mRNA) (UGT) (UDP-glycosyltransferase, teturUGT52) (UGT) (UDP-glycosyltransferase) (n/a) (Glycos	1e-78
Contig_01565	1.2363	tetur05g00060	2.17885	#N/A	length:434 (mRNA) (UGT) (UDP-glycosyltransferase, teturUGT20) (UGT) (UDP-glycosyltransferase) (n/a) (Glycos	9e-74
Contig_01565	1.2363	tetur05g00090	2.295	#N/A	length:435 (mRNA) (UGT) (UDP-glycosyltransferase, teturUGT23) (UGT) (UDP-glycosyltransferase) (n/a) (Glycos	8e-71
Contig_01565	1.2363	tetur22g00310	3.00056	#N/A	length:436 (mRNA) (UGT) (UDP-glycosyltransferase, teturUGT60) (UGT) (UDP-glycosyltransferase) (n/a) (glycos	4e-69
Contig_12199	1.23334	tetur22g00310	3.00056	#N/A	length:436 (mRNA) (UGT) (UDP-glycosyltransferase, teturUGT60) (UGT) (UDP-glycosyltransferase) (n/a) (glycos	2e-36
Contig_12199	1.23334	tetur22g00350	5.61058	#N/A	length:438 (mRNA) (UGT) (UDP-glycosyltransferase, teturUGT62) (UGT) (UDP-glycosyltransferase) (n/a) (Glycos	2e-35
Contig_03895	1.20531	tetur05g05290	#N/A	-2.20635	length:226 (mRNA) (TuGSTm11) (Glutathione S-transferase, class mu)	1e-104
Contig_03895	1.20531	tetur05g05290	#N/A	-2.20635	length:226 (mRNA) (TuGSTm11) (Glutathione S-transferase, class mu)	2e-77
Contig_03895	1.20531	tetur05g05250	3.10247	4.00534	length:228 (mRNA) (TuGSTm08) (Glutathione S-transferase, class mu)	3e-80
Contig_03895	1.20531	tetur05g05250	3.10247	4.00534	length:228 (mRNA) (TuGSTm08) (Glutathione S-transferase, class mu)	2e-77
Contig_03895	1.20531	tetur05g05190	2.58387	#N/A	length:233 (mRNA) (TuGSTm03) (Glutathione S-transferase, class mu)	2e-53
Contig_03895	1.20531	tetur05g05190	2.58387	#N/A	length:233 (mRNA) (TuGSTm03) (Glutathione S-transferase, class mu)	2e-50
Contig_14149	1.19282	tetur02g12540	#N/A	-2.98987	length:520 (mRNA) (n/a) (Kelch-domain protein) (n/a) (Hypothetical protein)	5e-45
Contig_14149	1.19282	tetur02g12580	3.75981	#N/A	length:513 (mRNA) (n/a) (Kelch-domain protein) (n/a) (Hypothetical protein)	2e-41
Contig_14149	1.19282	tetur02g12500	2.60588	2.9386	length:519 (mRNA) (n/a) (Kelch-domain protein) (n/a) (Hypothetical protein)	3e-37
Contig_14149	1.19282	tetur02g15051	#N/A	3.74655	length:530 (mRNA) (n/a) (hypothetical protein)	1e-31
Contig_03776	1.14706	tetur04g07770	2.36097	#N/A	length:438 (mRNA) (UGT) (UDP-glycosyltransferase, teturUGT18) (UGT) (UDP-glycosyltransferase) (n/a) (Glycos	0.0
Contig_03776	1.14706	tetur01g05690	-2.80769	#N/A	length:439 (mRNA) (UGT) (UDP-glycosyltransferase, teturUGT02) (UGT) (UDP-glycosyltransferase) (n/a) (Glycos	0.0
Contig_03776	1.14706	tetur01g05700	-2.24591	#N/A	length:444 (mRNA) (UGT) (UDP-glycosyltransferase, teturUGT03) (UGT) (UDP-glycosyltransferase) (n/a) (Glycos	0.0
Contig_03776	1.14706	tetur02g01310	2.12098	#N/A	length:439 (mRNA) (UGT) (UDP-glycosyltransferase, teturUGT06) (UGT) (UDP-glycosyltransferase) (n/a) (rhamno	7e-175
Contig_03776	1.14706	tetur32g01250	2.00285	#N/A	length:502 (mRNA) (UGT) (UDP-glycosyltransferase, teturUGT75) (UGT) (UDP-glycosyltransferase) (n/a) (glycos	1e-94
Contig_08287	1.08995	tetur14g04000	#N/A	-2.29171	length:411 (mRNA) (CHT7) (chitinase) (n/a) (chitinase)	9e-87
Contig_08287	1.08995	tetur14g04050	-8.15707	-3.76642	length:1901 (mRNA) (ECMP1) (endonuclease-chitinase multifunctional protein) (ECMP) (endonuclease-chitinase m	1e-41
Contig_02945	1.08299	tetur01g05740	17.2429	27.9526	length:192 (mRNA) (ApoD29) (Apolipoprotein D precursor) (n/a) (lipoprotein Blc)	6e-30
Contig_02945	1.08299	tetur01g05730	4.6762	9.22139	length:208 (mRNA) (ApoD28) (Apolipoprotein D precursor) (n/a) (apolipoprotein D)	1e-28
Contig_02945	1.08299	tetur01g05770	11.1367	21.7435	length:187 (mRNA) (ApoD30) (Apolipoprotein D precursor) (n/a) (lipoprotein Blc)	5e-28
Contig_02945	1.08299	tetur01g05750	11.1367	21.7435	length:187 (mRNA) (ApoD31) (Apolipoprotein D precursor) (n/a) (lipoprotein Blc)	5e-28
Contig_02945	1.08299	tetur09g04730	2.04331	#N/A	length:195 (mRNA) (ApoD20) (Apolipoprotein D precursor) (n/a) (PREDICTED: apolipoprotein D-like)	5e-23
Contig_08849	1.08106	tetur30g01290	-7.62843	-373.355	length:567 (mRNA) (TuCCE61) (Carboxyl/cholinesterase) (TuCCE-51) (Carboxyl/cholinesterase)	5e-64
Contig_08849	1.08106	tetur17g00080	2.21413	2.3677	length:561 (mRNA) (TuCCE44) (Carboxyl/cholinesterase) (TuCCE-38) (Carboxyl/cholinesterase)	1e-36
Contig_08849	1.08106	tetur17g00360	3.09152	3.24615	length:269 (mRNA) (CCEincTu08) (Carboxyl/cholinesterase, incomplete) (CCEinc-15) (Carboxyl/cholinesterase, i	1e-35
Contig_08849	1.08106	tetur207g00010	2.26827	2.39454	length:544 (mRNA) (TuCCE70) (Carboxyl/cholinesterase) (TuCCE-60) (Carboxyl/cholinesterase)	3e-35
Contig_08849	1.08106	tetur17g00300	2.28486	2.4327	length:574 (mRNA) (TuCCE45) (Carboxyl/cholinesterase) (TuCCE-39) (Carboxyl/cholinesterase)	3e-33
Contig_15408	1.01588	tetur19g02390	-2.16445	#N/A	length:215 (mRNA) (n/a) (Hypothetical protein)	7e-90
Contig_01023	1.00919	tetur14g02720	-2.53864	#N/A	length:312 (mRNA) (n/a) (Hypothetical protein)	1e-21
Contig_16082	1.00911	tetur01g06600	2.22966	#N/A	length:442 (mRNA) (n/a) (PREDICTED: hypothetical protein)	3e-124
Contig_16082	1.00911	tetur01g06570	#N/A	2.97613	length:445 (mRNA) (n/a) (sodium-dependent glucose transporter 1)	2e-123
Contig_16082	1.00911	tetur40g00030	12.0937	8.27581	length:437 (mRNA) (n/a) (Major facilitator superfamily, general substrate transporter)	2e-107
Contig_16082	1.00911	tetur21g00410	2.71448	#N/A	length:459 (mRNA) (n/a) (sodium-dependent glucose transporter 1)	8e-74
Contig_03176	1.00272	tetur01g05770	11.1367	21.7435	length:187 (mRNA) (ApoD30) (Apolipoprotein D precursor) (n/a) (lipoprotein Blc)	9e-19
Contig_03176	1.00272	tetur01g05750	11.1367	21.7435	length:187 (mRNA) (ApoD31) (Apolipoprotein D precursor) (n/a) (lipoprotein Blc)	9e-19
Contig_03176	1.00272	tetur01g05740	17.2429	27.9526	length:192 (mRNA) (ApoD29) (Apolipoprotein D precursor) (n/a) (lipoprotein Blc)	2e-18
Contig_03176	1.00272	tetur01g05730	4.6762	9.22139	length:208 (mRNA) (ApoD28) (Apolipoprotein D precursor) (n/a) (apolipoprotein D)	2e-18
Contig_03176	1.00272	tetur24g01030	4.14353	#N/A	length:227 (mRNA) (ApoD99) (apolipoprotein D) (n/a) (apolipoprotein D)	1e-17
Contig_11901	-1.0301	tetur04g09060	-3.94133	#N/A	length:413 (mRNA) (n/a) (dynein light chain)	9e-84
Contig_09349	-1.0461	tetur04g02370	3.30279	2.02235	length:2570 (mRNA) (n/a) (fatty acid synthase)	6e-39
Contig_03189	-1.09061	tetur08g07470	2.11574	#N/A	length:516 (mRNA) (n/a) (5'-AMP-activated protein kinase catalytic subunit alpha-2)	1e-17
Contig_12592	-1.10984	tetur24g02240	3.50901	#N/A	length:154 (mRNA) (n/a) (Hypothetical protein)	2e-18
Contig_09282	-1.1209	tetur02g11420	#N/A	-2.09303	length:335 (mRNA) (TuPap-9) (Cathepsin B) (TuPap-9) (Cathepsin B)	2e-54
Contig_09282	-1.1209	tetur28g01390	2.60559	#N/A	length:343 (mRNA) (TuPap-7) (Cathepsin B)	3e-47
Contig_09282	-1.1209	tetur55g00100	2.60559	#N/A	length:343 (mRNA) (TuPap-27) (Cathepsin B)	7e-47
Contig_06573	-1.17136	tetur03g01840	2.10451	#N/A	length:207 (mRNA) (n/a) (SCP-like extracellular)	3e-23
Contig_13810	-1.18524	tetur11g00910	-3.74662	#N/A	length:959 (mRNA) (LKAP28) (Limkain-b1)	8e-21
Contig_13810	-1.18524	tetur11g01160	#N/A	-2.22976	length:147 (mRNA) (n/a) (PREDICTED: similar to limkain b1)	2e-18
Contig_13810	-1.18524	tetur11g00720	#N/A	-11.2024	length:906 (mRNA) (n/a) (PREDICTED: similar to limkain b1)	8e-18
Contig_13810	-1.18524	tetur11g00730	-2.77883	#N/A	length:969 (mRNA) (n/a) (PREDICTED: similar to limkain b1)	7e-17
Contig_06900	-1.1855	tetur04g02370	3.30279	2.02235	length:2570 (mRNA) (n/a) (fatty acid synthase)	4e-19
Contig_01682	-1.23546	tetur13g04550	#N/A	2.20708	length:256 (mRNA) (n/a) (intradiol ring-cleavage dioxygenase) (n/a) (hypothetical protein)	6e-73
Contig_01053	-1.27532	tetur13g04550	#N/A	2.20708	length:256 (mRNA) (n/a) (intradiol ring-cleavage dioxygenase) (n/a) (hypothetical protein)	2e-73
Contig_08333	-1.28674	tetur32g00060	#N/A	-2.56891	length:442 (mRNA) (n/a) (PREDICTED: similar to Glucosylceramidase precursor)	7e-177
Contig_08333	-1.28674	tetur02g07770	#N/A	-2.06575	length:529 (mRNA) (n/a) (Glycoside hydrolase, subgroup, catalytic core)	2e-97
Contig_04793	-1.45397	tetur11g00910	-3.74662	#N/A	length:959 (mRNA) (LKAP28) (Limkain-b1)	6e-29
Contig_04793	-1.45397	tetur11g00730	-2.77883	#N/A	length:969 (mRNA) (n/a) (PREDICTED: similar to limkain b1)	9e-28
Contig_04793	-1.45397	tetur11g00720	#N/A	-11.2024	length:906 (mRNA) (n/a) (PREDICTED: similar to limkain b1)	5e-27
Contig_04793	-1.45397	tetur11g00790	#N/A	-2.42583	length:871 (mRNA) (n/a) (PREDICTED: similar to limkain b1)	3e-26
Contig_04793	-1.45397	tetur11g01160	#N/A	-2.22976	length:147 (mRNA) (n/a) (PREDICTED: similar to limkain b1)	9e-26
Contig_00595	-1.54001	tetur30g00220	3.29075	#N/A	length:287 (mRNA) (n/a) (cellular retinaldehyde-binding/triple function domain-containing protein)	2e-30
Contig_07778	-1.56722	tetur06g01690	#N/A	-2.21514	length:166 (mRNA) (n/a) (Glycoside hydrolase, subgroup, catalytic core)	6e-23
Contig_07778	-1.56722	tetur32g00060	#N/A	-2.56891	length:442 (mRNA) (n/a) (PREDICTED: similar to Glucosylceramidase precursor)	5e-17
Contig_16188	-1.63532	tetur05g05290	#N/A	-2.20635	length:226 (mRNA) (TuGSTm11) (Glutathione S-transferase, class mu)	6e-36
Contig_16188	-1.63532	tetur05g05290	#N/A	-2.20635	length:226 (mRNA) (TuGSTm11) (Glutathione S-transferase, class mu)	6e-36
Contig_16188	-1.63532	tetur05g05250	3.10247	4.00534	length:228 (mRNA) (TuGSTm08) (Glutathione S-transferase, class mu)	2e-31
Contig_16188	-1.63532	tetur05g05250	3.10247	4.00534	length:228 (mRNA) (TuGSTm08) (Glutathione S-transferase, class mu)	2e-31
Contig_16188	-1.63532	tetur05g05190	2.58387	#N/A	length:233 (mRNA) (TuGSTm03) (Glutathione S-transferase, class mu)	6e-17
Contig_16188	-1.63532	tetur05g05190	2.58387	#N/A	length:233 (mRNA) (TuGSTm03) (Glutathione S-transferase, class mu)	6e-17
Contig_12112	-1.64706	tetur04g02370	3.30279	2.02235	length:2570 (mRNA) (n/a) (fatty acid synthase)	1e-33
Contig_08155	-2.43191	tetur09g00480	-3.37433	#N/A	length:225 (mRNA) (DDM9-4) (Protein of unknown function DM9) (n/a) (Protein of unknown function DM9)	4e-37
Contig_08155	-2.43191	tetur09g00500	#N/A	-3.81395	length:222 (mRNA) (DDM9-8) (Conserved Protein of Unknown Function with 2 DM9 repeats) (n/a) (hypothetical pr	8e-37
Contig_08155	-2.43191	tetur17g03440	2.3724	#N/A	length:213 (mRNA) (DDM9-13) (Protein of unknown function DM9) (n/a) (Protein of unknown function DM9)	2e-29
Contig_08155	-2.43191	tetur10g05270	-2.03713	#N/A	length:203 (mRNA) (DDM9-15) (Conserved Protein of Unknown Function with 2 DM9 repeats) (n/a) (hypothetical p	7e-28
Contig_08155	-2.43191	tetur09g00490	-3.61047	#N/A	length:223 (mRNA) (DDM9-10) (Conserved Protein of Unknown Function with 2 DM9 repeats) (n/a) (Hypothetical p	1e-27
Contig_01232	-2.99539	tetur05g05250	3.10247	4.00534	length:228 (mRNA) (TuGSTm08) (Glutathione S-transferase, class mu)	1e-67
Contig_01232	-2.99539	tetur05g05190	2.58387	#N/A	length:233 (mRNA) (TuGSTm03) (Glutathione S-transferase, class mu)	3e-61
Contig_01232	-2.99539	tetur05g05290	#N/A	-2.20635	length:226 (mRNA) (TuGSTm11) (Glutathione S-transferase, class mu)	3e-57
Contig_01232	-2.99539	tetur07g00730	12.6561	9.66981	length:383 (mRNA) (RNI) (Ribonuclease Inhibitor) (n/a) (F-box domain, Skp2-like)	3e-31
Contig_01232	-2.99539	tetur06g02640	#N/A	2.13587	length:372 (mRNA) (RNI) (Ribonuclease Inhibitor) (n/a) (Hypothetical protein)	5e-30
Contig_00445	-3.9921	tetur30g01290	-7.62843	-373.355	length:567 (mRNA) (TuCCE61) (Carboxyl/cholinesterase) (TuCCE-51) (Carboxyl/cholinesterase)	6e-157
Contig_00445	-3.9921	tetur17g00080	2.21413	2.3677	length:561 (mRNA) (TuCCE44) (Carboxyl/cholinesterase) (TuCCE-38) (Carboxyl/cholinesterase)	5e-102
Contig_00445	-3.9921	tetur17g00300	2.28486	2.4327	length:574 (mRNA) (TuCCE45) (Carboxyl/cholinesterase) (TuCCE-39) (Carboxyl/cholinesterase)	9e-100
Contig_00445	-3.9921	tetur207g00010	2.26827	2.39454	length:544 (mRNA) (TuCCE70) (Carboxyl/cholinesterase) (TuCCE-60) (Carboxyl/cholinesterase)	1e-99
Contig_00445	-3.9921	tetur03g02700	-2.40316	#N/A	length:545 (mRNA) (TuCCE21) (Carboxyl/cholinesterase) (TuCCE-21) (Carboxyl/cholinesterase)	3e-92
Contig_05670	1.29057	tetur26g00930	-2.0716	#N/A	length:188 (mRNA) (n/a) (phosphatidylethanolamine-binding protein)	8e-36

## Sheet: SR-VP_DEGs
Additional file 18 - Differentially expressed genes in the T. urticae SR-VP strain (Demaeght et al. 2013, Insect Biochemistry and Molecular Biology)
T. urticae gene ID	Fold Change
tetur01g10750	33.6687
tetur24g00710	30.7839
tetur26g00890	29.0041
tetur06g02270	21.6064
tetur01g05740	17.2429
tetur27g00240	14.8964
tetur02g09690	14.7569
tetur07g00730	12.6561
tetur40g00030	12.0937
tetur01g05750	11.1367
tetur01g05770	11.1367
tetur03g08810	10.5386
tetur14g03560	10.3649
tetur12g03210	10.0205
tetur14g00100	9.89416
tetur03g08820	9.87944
tetur14g00080	9.62497
tetur01g10820	9.15315
tetur01g03900	8.53011
tetur15g02860	8.49712
tetur27g00350	8.46086
tetur30g01850	8.0578
tetur11g00840	7.73277
tetur20g00740	7.27566
tetur01g13310	6.507
tetur20g00750	6.19327
tetur27g00330	6.18061
tetur06g02590	5.89072
tetur20g02080	5.74284
tetur22g00350	5.61058
tetur01g05880	5.54506
tetur30g02080	5.51754
tetur05g06200	5.50508
tetur11g05210	5.47509
tetur11g05230	5.47509
tetur30g01950	5.26796
tetur07g07690	5.1577
tetur30g01070	5.12319
tetur16g03470	5.11996
tetur37g00370	4.95107
tetur08g07600	4.92192
tetur02g02980	4.84862
tetur30g01740	4.83527
tetur01g05730	4.6762
tetur14g01700	4.47075
tetur04g08630	4.43797
tetur03g08800	4.3828
tetur01g11270	4.37434
tetur05g00160	4.2971
tetur02g13910	4.27741
tetur30g01800	4.19433
tetur30g01690	4.18667
tetur15g02880	4.16776
tetur24g01030	4.14353
tetur30g01110	4.09561
tetur26g00560	4.09171
tetur22g00320	4.08363
tetur02g13860	4.01669
tetur11g05100	4.01452
tetur11g02840	3.999
tetur26g00550	3.99536
tetur06g03010	3.99483
tetur47g00110	3.96956
tetur47g00130	3.94091
tetur06g03050	3.922
tetur15g03880	3.88313
tetur15g03930	3.88313
tetur16g03190	3.8626
tetur31g00700	3.7947
tetur11g05110	3.77339
tetur407g00010	3.76521
tetur02g12580	3.75981
tetur24g02510	3.7429
tetur26g00490	3.74258
tetur07g03320	3.72416
tetur30g01660	3.71348
tetur35g00030	3.65836
tetur11g00810	3.64322
tetur16g03270	3.61362
tetur12g02130	3.54986
tetur43g00100	3.54375
tetur30g01090	3.52314
tetur24g02240	3.50901
tetur01g10740	3.47381
tetur20g00020	3.41983
tetur04g09070	3.38857
tetur07g00710	3.35861
tetur30g01730	3.35156
tetur04g02370	3.30279
tetur30g00220	3.29075
tetur04g02360	3.27529
tetur07g01930	3.20861
tetur30g01760	3.17998
tetur16g03660	3.17266
tetur14g03370	3.14644
tetur04g02380	3.11562
tetur05g05250	3.10247
tetur17g00360	3.09152
tetur61g00020	3.08591
tetur16g03200	3.071
tetur57g00060	3.06343
tetur19g02860	3.05929
tetur14g02810	3.05873
tetur07g02990	3.04465
tetur30g01820	3.01549
tetur22g00310	3.00056
tetur05g02100	2.97255
tetur24g02210	2.94719
tetur01g02470	2.92324
tetur20g00710	2.923
tetur71g00010	2.91754
tetur31g00710	2.90163
tetur02g14330	2.88332
tetur15g03980	2.87704
tetur22g00520	2.86695
tetur27g01020	2.86683
tetur16g03330	2.8473
tetur26g00430	2.84503
tetur24g01970	2.84192
tetur97g00070	2.84192
tetur27g00340	2.82951
tetur16g03180	2.77052
tetur09g03890	2.76874
tetur63g00050	2.76071
tetur31g00680	2.75724
tetur67g00010	2.75565
tetur82g00050	2.75436
tetur11g05000	2.73942
tetur11g03580	2.73748
tetur02g14020	2.72781
tetur17g03390	2.7224
tetur17g01900	2.7215
tetur21g00410	2.71448
tetur27g01030	2.71321
tetur09g05210	2.71189
tetur10g04830	2.70418
tetur47g00150	2.69242
tetur47g00090	2.65721
tetur35g00870	2.64214
tetur01g11840	2.63155
tetur02g13900	2.62898
tetur03g02680	2.61836
tetur06g03370	2.61324
tetur35g01290	2.61181
tetur02g12500	2.60588
tetur28g01390	2.60559
tetur55g00100	2.60559
tetur06g03380	2.60097
tetur665g00010	2.58995
tetur05g05190	2.58387
tetur05g02330	2.54464
tetur16g03630	2.53407
tetur09g04720	2.52754
tetur12g04460	2.51958
tetur30g01100	2.51399
tetur15g00350	2.50591
tetur30g01790	2.50487
tetur35g00590	2.50411
tetur16g03500	2.49928
tetur18g03640	2.4892
tetur16g03740	2.47953
tetur352g00010	2.47778
tetur19g02880	2.47589
tetur01g11260	2.46441
tetur186g00050	2.45537
tetur30g01750	2.45482
tetur10g04440	2.45464
tetur03g02780	2.44802
tetur35g01560	2.44735
tetur10g03190	2.44266
tetur10g04810	2.4407
tetur39g00610	2.44067
tetur07g03400	2.43932
tetur16g03760	2.43502
tetur03g07920	2.43096
tetur02g14310	2.42759
tetur47g00140	2.42711
tetur30g00710	2.42156
tetur31g00730	2.42116
tetur31g00780	2.42116
tetur90g00050	2.41465
tetur05g02310	2.41086
tetur31g00880	2.4094
tetur31g00900	2.4094
tetur06g02940	2.40776
tetur35g01590	2.39725
tetur11g03590	2.3959
tetur05g01420	2.38639
tetur17g03440	2.3724
tetur03g07980	2.37166
tetur05g04510	2.37139
tetur35g01240	2.36731
tetur35g01280	2.36731
tetur04g07770	2.36097
tetur02g14430	2.35677
tetur13g00020	2.35661
tetur31g00920	2.35305
tetur07g05780	2.34997
tetur09g06240	2.34754
tetur21g03270	2.33925
tetur35g00900	2.33511
tetur35g01640	2.33095
tetur06g02150	2.32302
tetur02g07420	2.32175
tetur20g00050	2.3179
tetur27g00230	2.31617
tetur35g01210	2.31393
tetur02g13070	2.30966
tetur01g12910	2.3054
tetur20g00290	2.30326
tetur04g07430	2.30321
tetur05g00090	2.295
tetur03g07880	2.28756
tetur541g00010	2.28653
tetur17g00300	2.28486
tetur49g00180	2.28295
tetur66g00060	2.28022
tetur66g00070	2.28022
tetur21g01150	2.27868
tetur13g02500	2.27033
tetur207g00010	2.26827
tetur05g00070	2.25871
tetur07g02250	2.2569
tetur06g02040	2.25483
tetur02g14100	2.24895
tetur06g00590	2.24039
tetur07g03220	2.23819
tetur07g03310	2.23616
tetur17g01150	2.23357
tetur01g06600	2.22966
tetur02g08030	2.22913
tetur30g02120	2.22814
tetur27g01730	2.21973
tetur12g03950	2.21746
tetur31g00670	2.21648
tetur17g00080	2.21413
tetur05g04540	2.21039
tetur46g00020	2.20739
tetur37g00660	2.20425
tetur05g01120	2.20377
tetur01g08470	2.20322
tetur26g00910	2.20055
tetur02g14110	2.20027
tetur17g02800	2.19998
tetur186g00040	2.19895
tetur01g12610	2.19295
tetur12g03940	2.19289
tetur06g02420	2.19256
tetur278g00020	2.19179
tetur05g02040	2.18183
tetur05g04520	2.18162
tetur05g00060	2.17885
tetur309g00020	2.17817
tetur03g04440	2.17542
tetur49g00090	2.1673
tetur05g04020	2.16509
tetur09g05010	2.15941
tetur174g00010	2.1565
tetur17g00350	2.15292
tetur13g03780	2.1506
tetur05g04500	2.14896
tetur03g03410	2.14735
tetur20g00470	2.14731
tetur02g10510	2.14574
tetur06g02780	2.14572
tetur11g05420	2.13692
tetur30g01840	2.13319
tetur03g00720	2.12988
tetur35g00180	2.1292
tetur30g01770	2.12831
tetur02g02910	2.12645
tetur507g00010	2.123
tetur207g00020	2.12238
tetur02g01310	2.12098
tetur49g00020	2.12015
tetur03g00980	2.11921
tetur02g04810	2.11846
tetur06g02030	2.11791
tetur08g07470	2.11574
tetur14g00970	2.11118
tetur11g05450	2.11064
tetur06g02110	2.1092
tetur03g02880	2.10568
tetur03g01840	2.10451
tetur07g01810	2.10134
tetur180g00010	2.09868
tetur18g02050	2.09319
tetur01g11880	2.09002
tetur06g01180	2.08352
tetur08g07590	2.08081
tetur01g05760	2.07622
tetur123g00050	2.07186
tetur05g02110	2.06532
tetur02g13950	2.06032
tetur07g02300	2.05939
tetur33g00930	2.05537
tetur15g03590	2.05488
tetur07g03520	2.05467
tetur05g04100	2.05202
tetur20g02030	2.05001
tetur03g09941	2.04747
tetur04g05350	2.04548
tetur02g02130	2.04455
tetur09g04730	2.04331
tetur01g10070	2.04238
tetur04g05510	2.04091
tetur44g00150	2.04066
tetur11g05010	2.03643
tetur16g00070	2.03633
tetur02g03510	2.02846
tetur08g07930	2.02783
tetur08g08050	2.02766
tetur28g00350	2.02649
tetur01g02490	2.02357
tetur396g00010	2.02357
tetur03g08840	2.01954
tetur32g00020	2.01949
tetur44g00230	2.01949
tetur02g01320	2.01571
tetur19g00200	2.01501
tetur06g02630	2.01338
tetur636g00010	2.01253
tetur437g00020	2.01104
tetur35g00850	2.00543
tetur49g00150	2.00346
tetur05g01130	2.00324
tetur32g01250	2.00285
tetur16g03320	2.00274
tetur01g06730	2.00023
tetur16g01390	-2.00483
tetur04g06000	-2.00519
tetur01g01000	-2.00844
tetur24g01040	-2.01287
tetur01g00950	-2.0149
tetur77g00020	-2.01582
tetur07g06940	-2.02509
tetur07g05770	-2.02597
tetur08g06630	-2.03489
tetur10g05270	-2.03713
tetur196g00010	-2.03994
tetur07g00810	-2.0415
tetur02g03470	-2.05322
tetur05g01470	-2.05562
tetur06g05710	-2.05977
tetur01g13150	-2.06613
tetur26g00930	-2.0716
tetur23g00750	-2.07382
tetur21g00250	-2.07613
tetur07g05900	-2.08276
tetur97g00010	-2.0842
tetur97g00040	-2.0842
tetur08g04450	-2.08752
tetur03g01080	-2.08853
tetur15g00270	-2.0894
tetur21g00260	-2.09605
tetur06g02400	-2.0975
tetur07g03860	-2.09822
tetur08g00230	-2.10592
tetur10g00300	-2.10743
tetur19g00740	-2.10829
tetur11g04840	-2.10899
tetur21g01400	-2.11098
tetur05g05640	-2.12133
tetur35g00680	-2.13053
tetur06g05100	-2.1349
tetur21g02980	-2.13544
tetur17g03900	-2.14159
tetur28g01150	-2.14499
tetur07g00760	-2.15868
tetur30g00260	-2.16238
tetur19g02390	-2.16445
tetur06g03360	-2.1724
tetur24g01910	-2.17544
tetur02g02930	-2.18806
tetur11g01830	-2.18825
tetur08g02560	-2.19104
tetur07g01740	-2.19243
tetur11g01240	-2.23266
tetur11g01940	-2.23396
tetur04g01300	-2.24201
tetur09g00640	-2.24515
tetur01g05700	-2.24591
tetur08g04100	-2.25184
tetur27g00280	-2.25782
tetur31g01970	-2.26641
tetur23g00260	-2.27195
tetur07g04260	-2.27659
tetur28g01710	-2.29488
tetur21g02480	-2.29619
tetur24g00160	-2.29925
tetur03g04470	-2.30631
tetur21g01590	-2.31628
tetur13g02160	-2.32064
tetur15g01500	-2.32564
tetur17g01270	-2.3298
tetur13g02190	-2.33902
tetur08g06260	-2.34763
tetur32g01830	-2.35081
tetur22g02330	-2.36201
tetur07g01060	-2.36576
tetur57g00040	-2.37827
tetur31g00370	-2.38497
tetur02g10740	-2.38979
tetur08g03350	-2.39272
tetur03g02700	-2.40316
tetur15g01520	-2.40926
tetur12g00610	-2.41001
tetur02g06120	-2.4219
tetur21g02440	-2.43217
tetur03g07440	-2.43901
tetur09g06700	-2.44965
tetur21g03020	-2.45882
tetur13g02350	-2.47372
tetur04g08760	-2.476
tetur02g08080	-2.48558
tetur21g02710	-2.53746
tetur14g02720	-2.53864
tetur13g00650	-2.54524
tetur02g07470	-2.56335
tetur13g02630	-2.56564
tetur06g04940	-2.57233
tetur21g01430	-2.58097
tetur28g02430	-2.60515
tetur02g02940	-2.60854
tetur02g02770	-2.61352
tetur19g03010	-2.61363
tetur02g00990	-2.63259
tetur11g02810	-2.63266
tetur17g01300	-2.69752
tetur31g01500	-2.69884
tetur86g00010	-2.70437
tetur24g00200	-2.70697
tetur10g02060	-2.70856
tetur10g03060	-2.72997
tetur01g03880	-2.75321
tetur06g03440	-2.7617
tetur26g00610	-2.76644
tetur06g05060	-2.7692
tetur07g02180	-2.76938
tetur13g00330	-2.77262
tetur24g00450	-2.77745
tetur11g00730	-2.77883
tetur01g05690	-2.80769
tetur21g02960	-2.81965
tetur05g01440	-2.82345
tetur05g01550	-2.82345
tetur02g07900	-2.82744
tetur02g09600	-2.85455
tetur02g07960	-2.86708
tetur06g04900	-2.88431
tetur19g00860	-2.91626
tetur07g02280	-2.93736
tetur05g03530	-2.94772
tetur02g06180	-2.98511
tetur06g04980	-3.02778
tetur02g05690	-3.03655
tetur06g04880	-3.0801
tetur24g00220	-3.09316
tetur05g06450	-3.09474
tetur557g00010	-3.10208
tetur06g04920	-3.11464
tetur02g01370	-3.13408
tetur15g01430	-3.13699
tetur09g00360	-3.1485
tetur27g00180	-3.1628
tetur171g00020	-3.17352
tetur06g04970	-3.18122
tetur08g06770	-3.20628
tetur40g00200	-3.21058
tetur06g05110	-3.21393
tetur33g01670	-3.21564
tetur02g14190	-3.22682
tetur84g00020	-3.22723
tetur12g00590	-3.23403
tetur12g02030	-3.28043
tetur05g04590	-3.30584
tetur07g07150	-3.31015
tetur02g09200	-3.33073
tetur28g01740	-3.34177
tetur21g00650	-3.36157
tetur09g00480	-3.37433
tetur17g03660	-3.42135
tetur12g00580	-3.47821
tetur26g00950	-3.49649
tetur17g01400	-3.58394
tetur09g00490	-3.61047
tetur02g14030	-3.63681
tetur11g01150	-3.64789
tetur22g02180	-3.65669
tetur11g00910	-3.74662
tetur533g00010	-3.82645
tetur43g00150	-3.86583
tetur21g03130	-3.87315
tetur04g09060	-3.94133
tetur06g05080	-4.00104
tetur02g07970	-4.13423
tetur02g08000	-4.13423
tetur07g02390	-4.16982
tetur60g00010	-4.28995
tetur271g00020	-4.33943
tetur33g01630	-4.45176
tetur14g00050	-4.76546
tetur07g01450	-4.90758
tetur531g00010	-4.91735
tetur02g14420	-5.07008
tetur02g14470	-5.07008
tetur21g03120	-5.51556
tetur30g01300	-5.88105
tetur02g09560	-5.93748
tetur21g03140	-6.10902
tetur46g00010	-6.19691
tetur24g00590	-6.20047
tetur11g05740	-6.55043
tetur14g01120	-6.81899
tetur11g05440	-7.08634
tetur07g02680	-7.27744
tetur248g00010	-7.27744
tetur19g02850	-7.37421
tetur17g00740	-7.41334
tetur07g02400	-7.56556
tetur30g01290	-7.62843
tetur01g10760	-7.72263
tetur21g01370	-7.79648
tetur14g03250	-7.83018
tetur14g04050	-8.15707
tetur08g07330	-8.79556
tetur02g07990	-8.81599
tetur26g00870	-9.32384
tetur11g01370	-9.47646
tetur27g00210	-9.63453
tetur17g02360	-10.8298
tetur30g01360	-13.0613
tetur21g01380	-13.3364
tetur24g00470	-13.4616
tetur14g01200	-13.8221
tetur30g01320	-14.1842
tetur07g00750	-15.1167
tetur04g02440	-15.7582
tetur04g03130	-19.5523
tetur09g00600	-21.9746
tetur11g05720	-41.3171
tetur05g03510	-45.7537
tetur11g05730	-52.5881
tetur11g00880	-53.9509
tetur11g04080	-87.5877
tetur32g00940	-275.911

## Sheet: SR-TK_DEGs
Additional file 18 - Differentially expressed genes in the T. urticae SR-TK strain (Demaeght et al. 2013, Insect Biochemistry and Molecular Biology)
T. urticae gene ID	Fold Change
tetur01g10750	92.1271
tetur01g05740	27.9526
tetur01g05750	21.7435
tetur01g05770	21.7435
tetur07g07690	17.3144
tetur07g01160	16.1558
tetur03g00140	15.0476
tetur27g00240	14.9934
tetur03g08810	14.0519
tetur02g09690	13.6358
tetur06g02270	12.6339
tetur02g07800	12.1651
tetur01g05880	10.6235
tetur03g08820	9.78176
tetur02g12710	9.73576
tetur07g00730	9.66981
tetur01g05730	9.22139
tetur11g05210	8.63201
tetur11g05230	8.63201
tetur01g03900	8.47703
tetur40g00030	8.27581
tetur352g00010	7.96431
tetur30g01070	7.91739
tetur30g01110	7.84782
tetur27g00350	7.76248
tetur09g06240	7.37393
tetur09g05210	7.18119
tetur37g00370	6.86587
tetur19g01240	6.7942
tetur11g00810	6.7735
tetur14g00100	6.24802
tetur02g02980	6.041
tetur06g03050	5.88773
tetur06g03010	5.86037
tetur04g05470	5.80528
tetur30g01950	5.68751
tetur30g02080	5.66246
tetur629g00010	5.62773
tetur30g01740	5.57894
tetur30g01090	5.57626
tetur30g00710	5.51192
tetur20g00720	5.45341
tetur17g01900	5.10845
tetur04g05500	4.83182
tetur180g00010	4.82726
tetur16g02210	4.79319
tetur05g02330	4.77782
tetur14g01700	4.75386
tetur12g00140	4.74684
tetur30g01690	4.68958
tetur20g00700	4.67544
tetur02g13510	4.65623
tetur30g01660	4.62998
tetur13g01090	4.48264
tetur01g00650	4.38922
tetur14g02810	4.35914
tetur20g00710	4.34587
tetur30g01760	4.22491
tetur08g06760	4.21741
tetur04g05530	4.15048
tetur11g00940	4.1134
tetur665g00010	4.06379
tetur01g15480	4.03646
tetur02g06740	4.01908
tetur05g05250	4.00534
tetur02g13900	3.89104
tetur09g00600	3.86771
tetur01g12410	3.85646
tetur16g03430	3.84251
tetur02g15051	3.74655
tetur12g02130	3.64557
tetur07g00710	3.62749
tetur11g03590	3.60053
tetur21g03321	3.49817
tetur20g00090	3.4718
tetur58g00100	3.4718
tetur35g01290	3.39188
tetur19g02860	3.36303
tetur05g01420	3.3505
tetur32g01980	3.3315
tetur10g03190	3.32917
tetur30g01720	3.28955
tetur05g02110	3.27189
tetur01g15870	3.2643
tetur17g00360	3.24615
tetur49g00150	3.23419
tetur248g00020	3.20385
tetur49g00180	3.17764
tetur09g03890	3.16971
tetur09g01180	3.15464
tetur49g00090	3.14135
tetur02g02750	3.1347
tetur35g01240	3.13442
tetur35g01280	3.13442
tetur06g03000	3.09437
tetur01g06020	2.99374
tetur01g06570	2.97613
tetur29g01210	2.97408
tetur04g04250	2.95493
tetur02g12500	2.9386
tetur20g00740	2.93561
tetur22g02100	2.92395
tetur47g00130	2.91459
tetur21g01150	2.90891
tetur34g00310	2.89612
tetur30g01820	2.88574
tetur01g15470	2.88013
tetur23g01040	2.85725
tetur186g00040	2.84002
tetur14g03430	2.83188
tetur05g02140	2.8286
tetur08g08267	2.80261
tetur06g03370	2.79118
tetur03g03410	2.72734
tetur47g00110	2.71766
tetur03g07560	2.70213
tetur07g03310	2.69695
tetur37g00660	2.68054
tetur07g05780	2.67867
tetur07g02750	2.675
tetur30g01730	2.67278
tetur01g11840	2.67241
tetur05g02130	2.66011
tetur01g12110	2.65806
tetur04g01370	2.64413
tetur57g00060	2.64267
tetur02g14100	2.64092
tetur35g00180	2.6137
tetur07g01320	2.60789
tetur82g00050	2.6032
tetur05g02380	2.58897
tetur05g06200	2.56039
tetur02g14110	2.55764
tetur05g00070	2.54212
tetur08g07250	2.54172
tetur05g02300	2.53502
tetur02g12230	2.52604
tetur03g04440	2.50454
tetur17g02230	2.48911
tetur02g02130	2.48354
tetur09g05260	2.47973
tetur12g03030	2.47959
tetur04g08630	2.47659
tetur34g00170	2.4715
tetur30g00700	2.45155
tetur20g03330	2.4476
tetur09g05010	2.44348
tetur17g00300	2.4327
tetur35g01220	2.42699
tetur05g05000	2.42439
tetur309g00020	2.40352
tetur207g00010	2.39454
tetur22g00650	2.38727
tetur18g02390	2.38551
tetur04g07030	2.38079
tetur07g03320	2.37574
tetur20g00020	2.37451
tetur17g00080	2.3677
tetur23g02240	2.35758
tetur23g02260	2.35758
tetur04g02380	2.3425
tetur36g00960	2.34091
tetur27g00410	2.33253
tetur20g03310	2.32989
tetur25g00960	2.32954
tetur08g01720	2.32699
tetur35g01590	2.3218
tetur04g06510	2.32079
tetur35g01560	2.32068
tetur07g07660	2.31934
tetur17g00350	2.31601
tetur49g00110	2.3027
tetur27g01020	2.29879
tetur30g02120	2.29687
tetur05g02250	2.28926
tetur550g00010	2.28904
tetur06g02630	2.28504
tetur24g02210	2.27161
tetur05g02500	2.26836
tetur37g00410	2.26657
tetur03g03060	2.26527
tetur16g03420	2.25268
tetur01g08370	2.25242
tetur207g00020	2.24718
tetur10g05620	2.24422
tetur16g03440	2.24093
tetur43g00580	2.23923
tetur01g00610	2.22925
tetur13g04550	2.20708
tetur39g00600	2.20637
tetur13g01890	2.19436
tetur07g05270	2.19347
tetur13g03800	2.19078
tetur29g00260	2.18718
tetur18g02360	2.17694
tetur07g07910	2.15636
tetur408g00010	2.1558
tetur647g00020	2.15255
tetur33g00350	2.14193
tetur06g02640	2.13587
tetur13g02400	2.13205
tetur01g08080	2.12964
tetur05g02120	2.11807
tetur02g02910	2.11341
tetur24g02580	2.1059
tetur01g04940	2.10075
tetur05g02390	2.09664
tetur05g05880	2.09656
tetur03g07980	2.08042
tetur22g01100	2.07868
tetur01g02470	2.07531
tetur35g00850	2.07105
tetur25g02070	2.06898
tetur13g04490	2.06867
tetur11g03580	2.06547
tetur26g00470	2.06342
tetur05g02220	2.05702
tetur22g01090	2.05257
tetur19g01280	2.0438
tetur02g14240	2.03505
tetur47g00220	2.03505
tetur04g05570	2.03332
tetur21g02150	2.03293
tetur647g00010	2.02613
tetur18g02410	2.02385
tetur14g03750	2.02331
tetur08g02000	2.02331
tetur04g02370	2.02235
tetur06g06180	2.02108
tetur15g02510	2.02001
tetur49g00030	2.01812
tetur49g00140	2.01284
tetur07g06360	2.00562
tetur08g06770	2.00419
tetur12g03170	-2.0033
tetur13g03160	-2.01768
tetur01g16391	-2.0248
tetur02g09600	-2.02489
tetur17g02910	-2.02972
tetur22g01620	-2.03017
tetur12g03220	-2.03029
tetur30g02400	-2.03472
tetur09g04550	-2.0351
tetur10g01920	-2.038
tetur04g09509	-2.0469
tetur01g11520	-2.05331
tetur20g02010	-2.0622
tetur02g00900	-2.06309
tetur02g07770	-2.06575
tetur619g00010	-2.06657
tetur12g03200	-2.07093
tetur18g02130	-2.07639
tetur01g15130	-2.07936
tetur02g11420	-2.09303
tetur01g00530	-2.10414
tetur11g04930	-2.11079
tetur33g01330	-2.11288
tetur36g00320	-2.11532
tetur22g01970	-2.11671
tetur07g03860	-2.12139
tetur05g00820	-2.12939
tetur352g00020	-2.1326
tetur04g06140	-2.13841
tetur04g01130	-2.14634
tetur02g00480	-2.15174
tetur05g02190	-2.15409
tetur12g00230	-2.15946
tetur30g00970	-2.16329
tetur05g00540	-2.16345
tetur07g06970	-2.1685
tetur01g03090	-2.17588
tetur10g01640	-2.18756
tetur25g00190	-2.18815
tetur08g04810	-2.19354
tetur05g05290	-2.20635
tetur07g04580	-2.20867
tetur03g00050	-2.20998
tetur08g08080	-2.20998
tetur38g00400	-2.21489
tetur06g01690	-2.21514
tetur11g01160	-2.22976
tetur08g05460	-2.23708
tetur23g00110	-2.23788
tetur34g00270	-2.24005
tetur01g16180	-2.24419
tetur04g04340	-2.25409
tetur04g05760	-2.25647
tetur22g02330	-2.25649
tetur15g03540	-2.25846
tetur08g04100	-2.25895
tetur08g02090	-2.26094
tetur01g16350	-2.27048
tetur15g00900	-2.27902
tetur14g04000	-2.29171
tetur02g07470	-2.29687
tetur26g00610	-2.30581
tetur04g04740	-2.31281
tetur31g01500	-2.32116
tetur17g01330	-2.33976
tetur04g08880	-2.3432
tetur05g00320	-2.36992
tetur05g04580	-2.37711
tetur283g00010	-2.38476
tetur01g07780	-2.39221
tetur31g00820	-2.39886
tetur09g05240	-2.40011
tetur26g00950	-2.41038
tetur04g05290	-2.41061
tetur04g07660	-2.41998
tetur11g00790	-2.42583
tetur14g03970	-2.44178
tetur08g03950	-2.45191
tetur13g02320	-2.45653
tetur377g00010	-2.45757
tetur31g01820	-2.46222
tetur13g00290	-2.46779
tetur02g06120	-2.47457
tetur21g02480	-2.48114
tetur07g02280	-2.49908
tetur28g01740	-2.51396
tetur245g00010	-2.52141
tetur04g00410	-2.53272
tetur13g02190	-2.56453
tetur32g00060	-2.56891
tetur27g01430	-2.57374
tetur101g00010	-2.57379
tetur05g07860	-2.59586
tetur03g02400	-2.62068
tetur31g01970	-2.63982
tetur15g03530	-2.65548
tetur32g00360	-2.6577
tetur06g05060	-2.69176
tetur70g00020	-2.70054
tetur10g05600	-2.72506
tetur05g03530	-2.73778
tetur02g06180	-2.74672
tetur03g04470	-2.75369
tetur02g10840	-2.76697
tetur08g05850	-2.79508
tetur10g00130	-2.79971
tetur03g02820	-2.80097
tetur22g02570	-2.80821
tetur28g01090	-2.84288
tetur05g06450	-2.85811
tetur08g01780	-2.92082
tetur03g01180	-2.92478
tetur95g00090	-2.94016
tetur14g01120	-2.9557
tetur21g00650	-2.9587
tetur02g12540	-2.98987
tetur40g00391	-3.00594
tetur77g00020	-3.01175
tetur23g00750	-3.09411
tetur07g02700	-3.10234
tetur21g03120	-3.1072
tetur03g00430	-3.11532
tetur17g03900	-3.17866
tetur58g00020	-3.20668
tetur21g03130	-3.21102
tetur08g02560	-3.22609
tetur40g00200	-3.24098
tetur20g00540	-3.26939
tetur08g07330	-3.30442
tetur13g03270	-3.32577
tetur11g00960	-3.3306
tetur01g10760	-3.36318
tetur02g00340	-3.36595
tetur06g05110	-3.38221
tetur447g00010	-3.41456
tetur15g01430	-3.44848
tetur05g04020	-3.45237
tetur30g01920	-3.48048
tetur06g04880	-3.53039
tetur02g01370	-3.65813
tetur11g00950	-3.67481
tetur07g01450	-3.69779
tetur01g13150	-3.71759
tetur55g00070	-3.7273
tetur28g01360	-3.73432
tetur14g01060	-3.75508
tetur14g04050	-3.76642
tetur470g00010	-3.78433
tetur32g01830	-3.80948
tetur09g00500	-3.81395
tetur04g00820	-4.05191
tetur33g01670	-4.2393
tetur03g08780	-4.33422
tetur14g00050	-4.43708
tetur02g00240	-4.71688
tetur02g03940	-4.98611
tetur03g01900	-5.38429
tetur191g00030	-5.38429
tetur16g00590	-5.49657
tetur30g01270	-5.6486
tetur02g09560	-5.6492
tetur24g00880	-5.67163
tetur02g05310	-5.73724
tetur531g00010	-5.88777
tetur17g01400	-6.30899
tetur09g03540	-6.4412
tetur46g00010	-6.5745
tetur58g00050	-6.6883
tetur08g03110	-6.78069
tetur16g01390	-7.04211
tetur11g05740	-7.42156
tetur02g13860	-7.45942
tetur02g00990	-7.53647
tetur13g02160	-8.01808
tetur11g05440	-8.12424
tetur07g02680	-8.15833
tetur248g00010	-8.15833
tetur15g03890	-8.54656
tetur11g00850	-8.8263
tetur07g02400	-9.38564
tetur21g03140	-9.49148
tetur21g00780	-9.54559
tetur24g00510	-10.8554
tetur24g00750	-10.9862
tetur11g00720	-11.2024
tetur25g00870	-11.2605
tetur02g12840	-13.136
tetur24g00960	-13.4579
tetur26g02829	-13.4579
tetur06g05080	-13.7958
tetur22g02140	-15.3043
tetur33g01630	-16.7159
tetur04g02440	-17.718
tetur21g00340	-23.6643
tetur17g02360	-24.6146
tetur11g00870	-26.9271
tetur13g02350	-27.3342
tetur14g00160	-41.1302
tetur13g00610	-59.3048
tetur14g03250	-63.3249
tetur13g02630	-71.0663
tetur11g00880	-77.7762
tetur05g03510	-78.7605
tetur11g05720	-80.4699
tetur04g03130	-97.7873
tetur11g05730	-116.445
tetur02g09200	-139.387
tetur30g01320	-141.262
tetur43g00100	-152.595
tetur07g00750	-211.045
tetur20g00310	-225.03
tetur30g01300	-232.147
tetur11g04080	-243.129
tetur30g01290	-373.355
tetur09g00900	-456.039
tetur11g03170	-645.271
tetur32g00940	-841.822
